# Supplementary material for: Osmium-nitrido corroles as NIR indicators for oxygen sensors and triplet sensitizers for organic upconversion and singlet oxygen generation
Source: Royal Society of Chemistry journal article supplement (doi:10.1039/c6tc01126h), 2016-01-01
Supplement: c6tc01126h1.pdf [file c6tc01126h1.pdf]

## Electronic Supplementary Information

### **Osmium-nitrido corroles as NIR indicators for oxygen sensors and triplet sensitizers for organic upconversion and singlet oxygen generation**

**Sergey M. Borisov,<sup>\*,1</sup> Abraham Alemayehu,<sup>2</sup> Abhik Ghosh<sup>\*,2</sup>**

<sup>1</sup>Institute of Analytical Chemistry and Food Chemistry, NAWI Graz, Graz University of Technology, Stremayrgasse 9, 8010, Graz, Austria

<sup>2</sup>Department of Chemistry and Center for Theoretical and Computational Chemistry UiT – The Arctic University of Norway, 9037 Tromsø, Norway

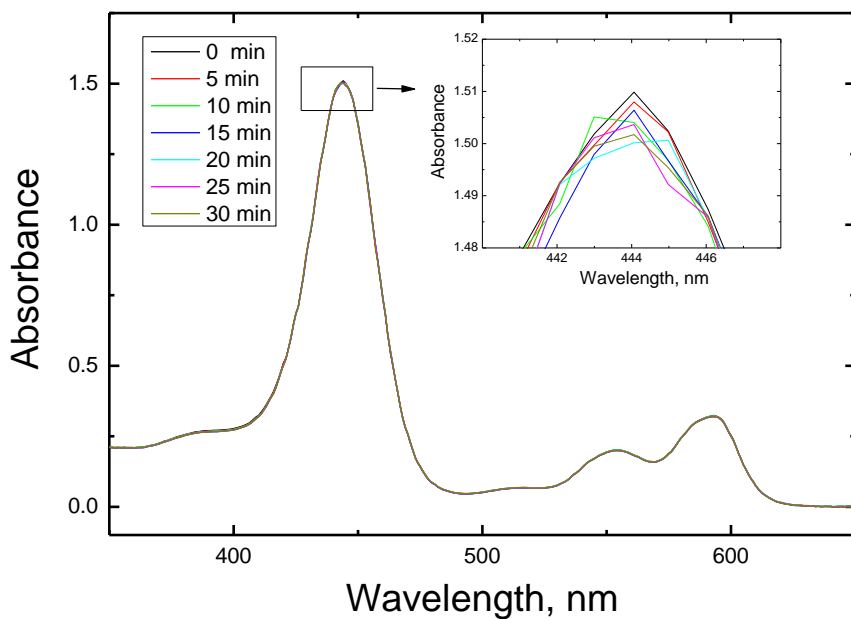

**Figure S1.** Absorption spectra of Os[TpCF<sub>3</sub>PC](N) in air-saturated toluene upon irradiation with 590-nm high power LED array.

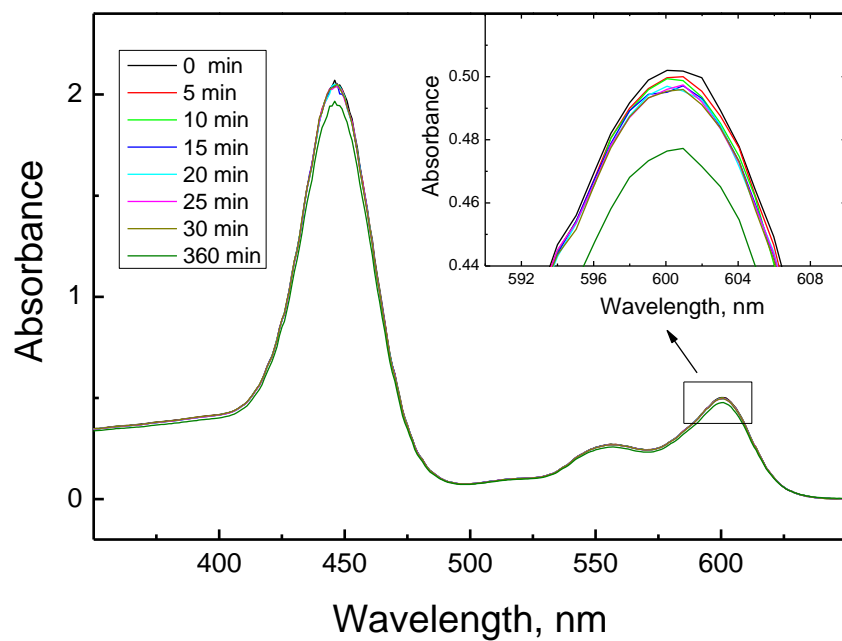

**Figure S2.** Absorption spectra of Os[TpOCH<sub>3</sub>PC](N) in air-saturated toluene upon irradiation with 590-nm high power LED array.

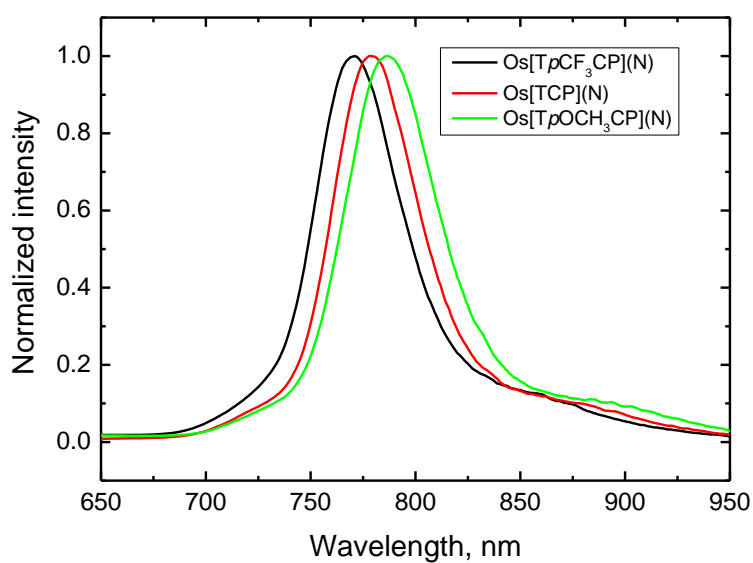

**Figure S3.** Emission spectra nitridoosmium(VI) corroles in polystyrene under nitrogen (25 °C,  $\lambda_{\text{exc}}$  590 nm).

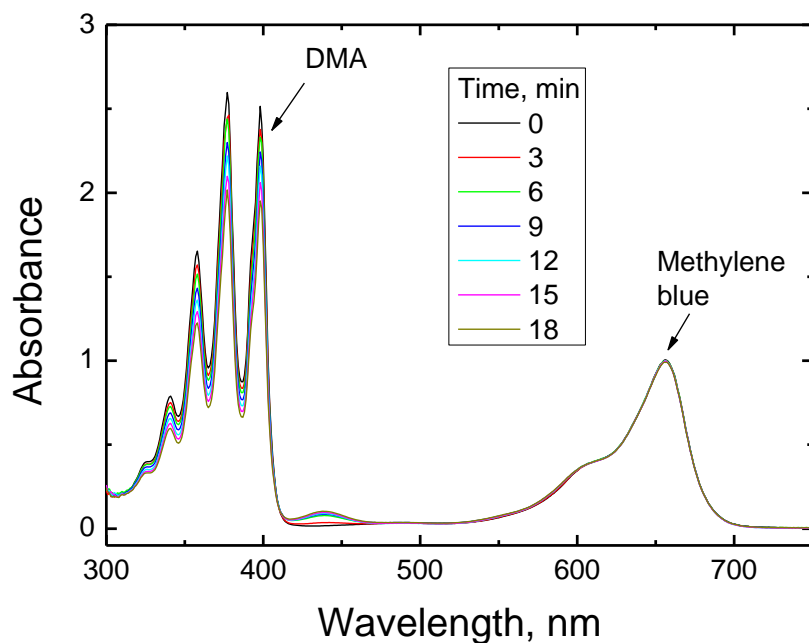

**Figure S4.** Bleaching of 9,10-dimethylanthracene (0.28 mM) in air saturated EtOH:THF (9:1) solution in presence of methylene blue (13.5  $\mu\text{M}$ ) upon excitation with orange light ( $595 \pm 5$  nm; photon flux  $4000 \mu\text{mol}\cdot\text{s}^{-1}\cdot\text{m}^{-2}$ ).

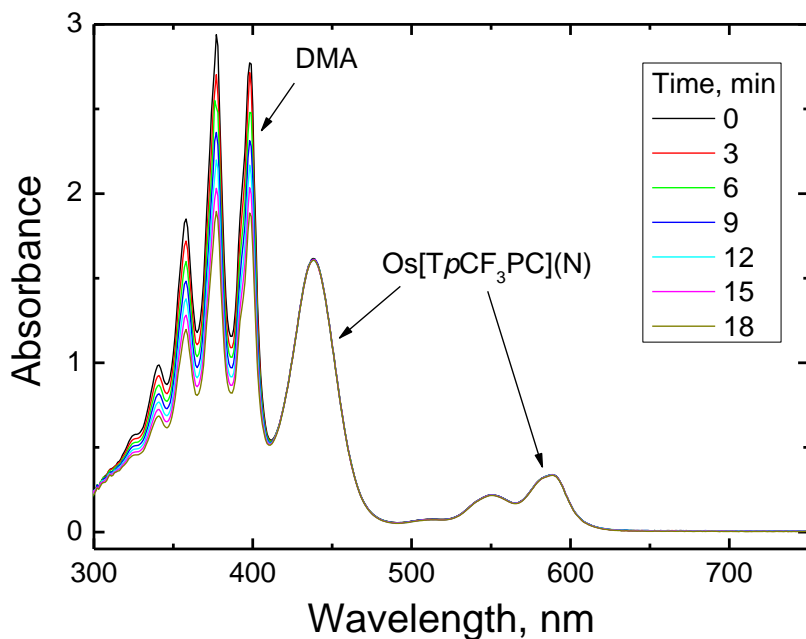

**Figure S5.** Bleaching of 9,10-dimethylantracene (0.28 mM) in air saturated EtOH:THF (9:1) solution in presence of Os[TpCF<sub>3</sub>PC](N) (19.5 μM) upon excitation with orange light (595±5 nm; photon flux 4000 μmol·s<sup>-1</sup>·m<sup>-2</sup>).

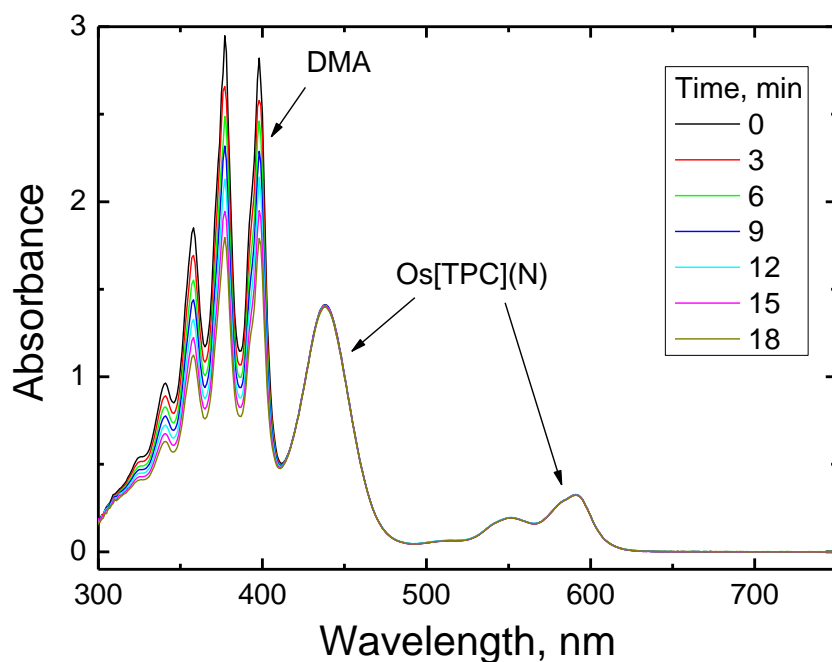

**Figure S6.** Bleaching of 9,10-dimethylantracene (0.28 mM) in air saturated EtOH:THF (9:1) solution in presence of Os[TPC](N) (14.4 μM) upon excitation with orange light (595±5 nm; photon flux 4000 μmol·s<sup>-1</sup>·m<sup>-2</sup>).

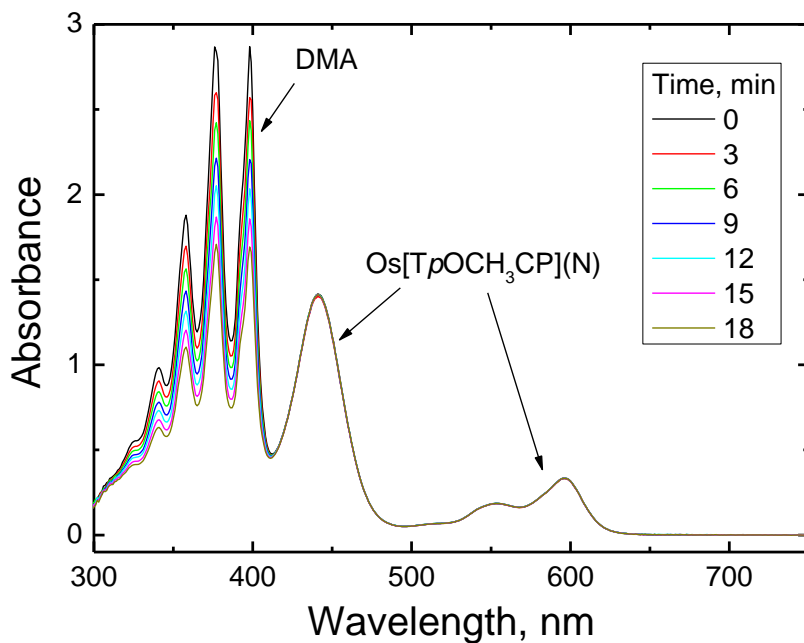

**Figure S7.** Bleaching of 9,10-dimethylantracene (0.28 mM) in air saturated EtOH:THF (9:1) solution in presence of Os[TpOCH<sub>3</sub>PC](N) (15.6 μM) upon excitation with orange light (595±5 nm; photon flux 4000 μmol·s<sup>-1</sup>·m<sup>-2</sup>).

**Table S1.** Sensing properties of the optodes at different temperatures

| Complex                      | T, °C | $\tau_0$ ,<br>$\mu\text{s}$ | $K_{SV}^1$ ,<br>$\text{kPa}^{-1}$ * | $k_q$ ,<br>$\text{Pa}^{-1}\text{cm}^{-1}$ |
|------------------------------|-------|-----------------------------|-------------------------------------|-------------------------------------------|
| Os[TpOCH <sub>3</sub> PC](N) | 5     | 142                         | 0.77                                | 5.4                                       |
|                              | 25    | 136                         | 0.91                                | 6.7                                       |
|                              | 45    | 131                         | 1.07                                | 8.2                                       |
| Os[TPC](N)                   | 5     | 164                         | 0.99                                | 6.0                                       |
|                              | 25    | 158                         | 1.03                                | 6.5                                       |
|                              | 45    | 152                         | 1.28                                | 8.4                                       |
| Os[TpCF <sub>3</sub> PC](N)  | 5     | 188                         | 1.19                                | 6.3                                       |
|                              | 25    | 183                         | 1.38                                | 7.5                                       |
|                              | 45    | 178                         | 1.66                                | 9.3                                       |

\*decay time Stern-Volmer plots; eq. 1; fit parameters:  $m = 0.08$ ;  $f = 0.68$  for all optodes and temperatures
